# **Title: Dissociating task acquisition from expression during learning reveals latent knowledge**

**Authors:** Kishore V. Kuchibhotla<sup>1,2\*#</sup>, Tom Hindmarsh Sten<sup>3,4#</sup>, Eleni S. Papadoyannis<sup>3,4</sup>, Sarah Elnozahy<sup>1</sup>, Kelly Fogelson<sup>1</sup>, Rupesh Kumar<sup>5</sup>, Yves Boubenec<sup>5</sup>, Peter C. Holland<sup>1,2</sup>, Srdjan Ostojic<sup>6</sup>, and Robert C. Froemke<sup>3,4,7</sup>

## **Affiliations:**

1 Department of Psychological and Brain Sciences, Johns Hopkins University, Baltimore, MD 21218

2 Department of Neuroscience, Johns Hopkins Medical School, Baltimore, MD 21218

3 Skirball Institute, Neuroscience Institute, Departments of Otolaryngology, Neuroscience and Physiology, New York University School of Medicine, New York, NY, 10016, USA.

4 Center for Neural Science, New York University, New York, NY, 10003, USA.

5 Laboratoire des Systèmes Perceptifs, UMR8248, École Normale Supérieure - PSL Research University, Paris, France

6 Laboratoire de Neurosciences Cognitives, INSERM U960, École Normale Supérieure - PSL Research University, Paris, France

7 Howard Hughes Medical Institute Faculty Scholar

\* Correspondence to: [kkuchib1@jhu.edu](mailto:kkuchib1@jhu.edu)

# K.V.K. and T.H.S. are co-first authors

## SUMMARY

Performance on cognitive tasks during learning is used to measure intelligence, yet it remains controversial since such testing is susceptible to contextual factors. To what extent does performance during learning depend on the testing context, rather than underlying knowledge? We trained mice, rats and ferrets on a range of tasks to examine how testing context impacts the acquisition of knowledge versus its expression. We interleaved reinforced trials with “probe” trials in which we omitted reinforcement. Across tasks, each animal species performed remarkably better in probe trials during learning and inter-animal variability was strikingly reduced. Reinforcement feedback is thus critical for learning-related plasticity but, paradoxically, masks the expression of underlying knowledge. We capture these results with a network model in which learning occurs during reinforced trials while context modulates only the read-out parameters. Probing learning by omitting reinforcement thus uncovers latent knowledge and identifies context—not “smartness”—as the major source of individual variability.

## HIGHLIGHTS

- Knowledge acquisition and expression can be segregated by the introduction of non-reinforced probe trials across a variety of animal species and behavioral tasks.
- Animals learn much faster and in a more stereotyped way in non-reinforced probe trials than their performance in the presence of reinforcement suggests.
- Underperformance and variability in performance arise from sensitivity to the behavioral testing context, not acquisition of sensorimotor associations.
- A circuit model accounts for context-dependent performance by modulating the integration of sensorimotor associations.

## eTOC

Kuchibhotla et al. show the acquisition and expression of knowledge can be behaviorally dissociated in mice, rats, and ferrets across a variety of sensorimotor tasks. Across animals, variability in performance arises from the testing context, not underlying aptitude.

# INTRODUCTION

Assessment of learning and aptitude often requires animals and humans to report their underlying knowledge at a given moment, often in specific testing environments or contexts (Maloney and Beilock, 2012). In reinforcement learning paradigms, learning rates are inferred from behavioral reports (Lee et al., 2012). Self-reporting, however, is highly sensitive to a variety of contextual factors unrelated to knowledge of the core task demands (Godden and Baddeley, 1975; Wright and Shea, 1991), potentially confounding the interpretation of behavioral performance. Animal models of learning have gained traction in recent years because they allow more direct links to be established between behavioral performance, computations and algorithms used for learning, and neural implementations of these algorithms (Marr). The ability to monitor the activity of the same neurons over many days using chronic two-photon imaging (Huber et al., 2012) and single-unit electrophysiology (Dhawale et al., 2017) has further accelerated the exploration of neural mechanisms of learning. To date, studies focused on acquisition of task knowledge (i.e., learning rate) depend upon measuring expression of that knowledge by an animal's own self-report. This is true for sensorimotor tasks typically used across sensory modalities (Chu et al., 2016; Huber et al., 2012; Jurjut et al., 2017; Kato et al., 2015; Peron et al., 2015; Peters et al., 2014; Poort et al., 2015).

Moreover, a key tenant of behavioral and systems neuroscience posits that humans and other animals learn tasks at vastly different rates (Bathellier et al., 2013; Halpern et al., 1999; Huber et al., 2012; Luksys et al., 2009; Matzel et al., 2003; Poort et al., 2015). This has led to the idea that inter-animal variability in performance arises from differences in underlying learning rate parameters that impact the rate of task acquisition (Bathellier et al., 2013; Doya, 2000; Sutton and Barto, 1998). While attempts have been made to link learning-related performance variability to various modulatory factors (Joëls et al., 2006; Luksys et al., 2009), these approaches mostly focus on the acquisition of task-related contingencies.

Here, we examined whether manipulating the testing context could dissociate the acquisition of underlying stimulus-action associations from context-dependent expression of acquired knowledge. We introduced a simple behavioral manipulation, removing access to reinforcement ("probe context"), and then measured behavioral performance in two distinct contexts, one with reinforcement and the other without. We probed behavioral performance in mice, rats and ferrets

85 on a range of tasks to ensure that our approach is generalizable. Finally, we modeled our  
86 behavioral results with a network model in which learning occurs during reinforced trials while  
87 context modulates only the read-out parameters. In doing so, we sought to reveal whether  
88 performance variability during learning depends more on underlying knowledge or testing  
89 context.

# RESULTS

## Expression of task knowledge during learning is context-dependent

To determine how context affects the behavioral assessment of learning, we first trained mice on an auditory go/no-go stimulus recognition task (Kuchibhotla et al., 2016) (**Figure 1A**). Mice learned to lick for a water reward provided through a lick tube after hearing a conditioned stimulus (the ‘target’ tone) and to withhold from licking after hearing an unrewarded (‘foil’) tone of a different frequency (**Figure 1B**). Similar to a previous report (Kuchibhotla et al., 2016), animals learned to perform the task at expert levels in the reinforced context over the course of multiple training sessions (**Figure 1C**). At expert levels, mice consistently licked to the target tone (**Figure 1D**) and withheld from licking to the foil tone (**Figure 1D, Movie S1**).

Over the course of learning, we interleaved the reinforced context with a smaller number of trials without reinforcement by removing the licktube (‘probe context’, **Figure 1E**). In the probe context, we removed the licktube for a subset of trials (<40) in order to test whether absence of reinforcement would change the self-report of the mice. First, we focused on a trial block early in learning (trial block 1500-2000) when animals were tone responsive; i.e., they licked indiscriminately to both target and foil tones in the reinforced context, but did not lick during the inter-trial interval (**Figure 1F**, ‘reinforced context’, **Figure 1G, Movie S2**; hits:  $96.0 \pm 1.4\%$ , false-alarms:  $81.0 \pm 4.6\%$ ). Surprisingly, when we removed the licktube for the probe trials, all mice discriminated between the tones by reliably licking to targets while rarely licking to foils, exhibiting expert performance despite their variable and often poor performance in the presence of the licktube (**Figure 1F**, ‘probe context’, **Figure 1G, Movie S3**, hit rate:  $93.0 \pm 2.1\%$ , false-alarm rate:  $19.0 \pm 3.5\%$ ). The improvement of behavioral performance was specific to the probe context, and did not drive improvements in performance in reinforced trials immediately following the probing (**Figure 1H-J**). Mice therefore appeared to understand the task contingencies many days before they expressed this knowledge in the presence of reinforcement.

We then tracked probe learning trajectories throughout learning in a subset of mice (**Figure 1K-M**). Differences in acquisition versus expression were particularly acute early in learning (**Figure 1K**, example mouse; **Figure 1L**, summary of all mice, reinforced trials to expert:  $4728 \pm 647$  trials; probe trials to expert:  $1765 \pm 108$  trials;  $N=7$  mice,  $p=0.0055$ ). Interestingly,

behavioral performance in the probe context more judiciously separated the stages of associative learning as shown by the hit and false alarm rates over learning (**Figure 1M**). Animals discriminated poorly early in learning (trials 0-500) in both contexts, with a markedly lower action rate in the probe context (**Figure 1M**, trials 0-500: reinforced hit rate:  $82.3 \pm 3.8\%$ , reinforced false-alarm rate:  $78.2 \pm 2.8\%$ ; probe hit rate:  $35.8 \pm 7.8\%$ , probe false-alarm rate:  $25.1 \pm 6.9\%$ ,  $N=7$  mice,  $F(3,18)=33.17$ ,  $p<0.001$  between contexts,  $p>0.05$  within contexts, one-way repeated-measures ANOVA followed by Tukey's post-hoc correction; probe context. **Figure 1L**  $d'$ :  $0.3 \pm 0.2$ ; reinforced context:  $d'$ :  $0.2 \pm 0.1$ ;  $t(6)=0.7055$ ,  $p=0.51$ , Student's paired two-tailed t-test). Moreover, hit and false alarm rates were equally affected by the presence of reinforcement at this early stage ( $\Delta\text{Target}=46.6 \pm 6.8\%$ ,  $\Delta\text{Foil}=53.1 \pm 8.3\%$ ,  $t(6)=-0.988$ ,  $p=0.36$ , Student's paired two-tailed t-test). As learning progressed in the probe context, animals first acquired a generalized tone-reward association. This resulted in a modest increase in both the hit and false-alarm rates in the probe context (**Figure 1M**). Subsequently, performance in the probe context subsequently rapidly improved as the tone-reward association became increasingly stimulus specific. Overall, these data show that the acquisition of task knowledge or contingencies (e.g., some stimuli predict positive outcomes, others do not) can be dissociated from the expression of that knowledge (e.g., the decision to lick or not).

Learning studies often focus on single task structures and single animal models, making it difficult to distill general principles of learning across species and behavior. In particular, using licking as the operant response is a potential confound, as the motor action of licking is used as both the learned motor action and the consummatory appetitive response. Moreover, head-fixed mice may use different strategies and/or be particularly sensitive to reinforcement given their limited ability to forage (due to head-fixation). For example, freely-moving rodents may engage in different types of exploratory foraging than head-fixed animals. To address whether testing context influences performance in other task structures and other species, we performed additional studies in mice, rats and ferrets.

First, we tested whether separating the motor action from the consummatory response would retain (or abolish) the dissociation between task acquisition and expression. In the reinforced context, head-fixed mice were trained to press a lever in response to the target tone to gain access to water reward provided through a licktube (**Figure S1A-B**). This design added an additional

key feature: the licktube was normally absent in the reinforced context and was only introduced for a short period to deliver the water and then immediately retracted. As a result, the sensory environment in the probe and reinforced contexts were identical, removing the possibility of the licktube presence in the reinforced context as an impulsive driver of licking; instead, the possibility of reinforcement was more abstract. Early in learning (trial block 1500-2000), we found that mice pressed the lever at high rates for both the target and foil tones in the reinforced context (**Movie S4; Figure S1C**, hit rate= $95.3 \pm 3.3\%$ , false-alarm rate= $80.0 \pm 7.1\%$ ,  $p=0.3$ ). In the probe context, however, we observed a high response rate for the target tone but a stark reduction in responding to the foil tone, similar to what we observed in the lick-version of this task (**Movie S5; Figure S1C**, hit rate= $86.5 \pm 5.4\%$ , false-alarm rate= $37.5 \pm 7.8\%$ ,  $p=0.014$ ). Later in learning, we observed high hit rates and low false-alarm rates in both the reinforced and probe contexts (**Figure S1D**). This demonstrates a clear dissociation between acquisition and expression and is similar to our observations in the previous lick-based version of this task.

Second, we assessed whether task acquisition and expression were dissociated in freely-moving rats using a different audiovisual behavioral paradigm. In the reinforced context of this Pavlovian feature-negative discrimination task, a tone alone (S+) predicts the appearance of food in a food cup, whereas a light presented 5s before the same tone (S-) reverses its predictive quality such that no food is delivered. In the probe context, food was not delivered to the food cup for either the S+ or S-. This task benefits from an “analog” measure of performance: rather than a binary decision (such as lick or no-lick), responses to each stimulus type was recorded as the percentage of the food-sampling window (5 s post-stimulus) rats spent in the food cup. We found that rats learned this task in the reinforced context within 8 trial blocks (**Figure 2B**, 3-8 trial blocks to expert). Remarkably, freely-moving rats reliably discriminated in probe trials much earlier in training than they did in reinforced trials – all rats spent significantly less time at the food cup following the S- stimulus than following the S+ stimulus (**Figure 2C**). Thus, paralleling the task-learning in head-fixed mice, probe trials revealed that rats in this freely-moving task had acquired the correct stimulus-action associations long before their performance in the presence of reinforcement reached expert levels (**Figure 2D**). Animals also performed significantly better in the probe context even after their performance had reached expert levels in the reinforced context (**Figure 2E**)



Third, we aimed to determine whether dissociation between acquisition and expression could be observed in a fear conditioning task. To determine how general these results are across different tasks, we examined the behavior of rats in a previous study of fear conditioning (Holland and Lamarre, 1984). In this feature-negative discrimination task, rats were first trained to press a lever for sucrose reinforcement, and Pavlovian fear conditioning procedures were subsequently superimposed on this operant lever pressing baseline. When a tone target stimulus was presented alone (S+), it was paired with foot shock, but not when it was presented following a light feature (S-). Fear conditioning was assessed by measuring the suppression of operant lever press responding during the tone, and discrimination as the difference in suppression ratio to the S+ and S-. In this earlier study, Holland and Lamarre (Holland and Lamarre, 1984) assessed performance in reinforced versus probe contexts but did not explicitly compare the two. We found that – similar to our results with appetitive conditioning – performance in the probe context was greatly improved compared to the reinforced context in trained animals (**Figure 2F**).

Fourth, we tested whether the dissociation between reinforced and probe contexts occurs could be observed in freely-moving animals when the motor action was distinct from the consummatory response. In an operant task in freely-moving rats in which a lever press was required (Gallagher and Holland, 1992) (see methods and figure legend), we also observed a significant improvement in performance in the probe compared to the reinforced contexts (**Figure 2G-H**).

Finally, we ensured that these results were not specific to rodents, by performing similar behavioral experiments in two ferrets. Ferrets are carnivores with gyrencephalic brains and well-differentiated frontal cortices similar to primates (Smart and McSherry, 1986). We trained head-fixed ferrets to discriminate between two click-trains in a go/no-go task design. Ferrets also performed substantially better in the probe context much earlier in training as compared to the reinforced context (**Figure S2A-C**). Taken together, the dissociation between acquisition and expression reveals latent knowledge in mice, rats, and ferrets and across a variety of task designs suggesting that this may be a general principle of learning.

## A network model dissociates acquisition and expression of knowledge during reinforcement learning

What computational mechanisms may underlie the dissociation between learning curves in reinforced and probe trials? Classical reinforcement learning theory describes behavioral learning in terms of two systems, one that updates values of different stimulus-action associations based on the obtained reinforcement, and another that generates actions in response to stimuli by reading out the values of the different options. We hypothesized that learning of action values takes place only during reinforced trials, while the changes between contexts (reinforced and probe trials) do not change the learned values of different options, but modulate only the read-out parameters to consider factors such as impulsivity or exploration. Such a mechanism would lead to a difference at the level of behavioral performance between contexts, without any change of the underlying action values which represent task knowledge.

To test this hypothesis, we focused on a specific network implementation of reinforcement learning for go/no-go tasks (Bathellier et al., 2013; Fusi et al., 2007). We constructed a computational model of reinforcement learning in which action values were represented at the level of synapses projecting from a sensory ( $S^+$ ,  $S^-$ , and  $S$ ) to output populations ( $D$  and  $I$ ) (**Figure 3A**, gray), while action generation was governed by the parameters of the upstream readout units (**Figure 3A**, orange). This type of model is biologically plausible and has been found to more accurately characterize rodent behavioral data than standard reinforcement learning models (Bathellier et al., 2013). In our model, the equation by which the readout units processed information from the sensory population was changed in a context dependent fashion by way of a single parameter. We fit the model to our mouse, rat and ferret data and examined whether contextual modulation of the readout could quantitatively account for the behavioral learning trajectories (**Figure 3C-F**).

We found that our model simultaneously captured the learning curves in the reinforced and probe trials in each of the tasks across mice, rats, and one ferret. This minimal model therefore provided a parsimonious description of a large and diverse dataset (**Figure 3C-F**, **S2D**), and validated our hypothesis that changes between contexts only modulate how the learned values of stimulus-action associations are read out, but not the values themselves (**Figure 3B**). The model moreover constrained the possible mechanisms underlying the contextual modulation of the

readout. One possibility was that context modulated only the behavioral readout via scaling of the readout gain that classically determines the amount of exploration (Daw et al., 2006; Silver, 2010). This candidate mechanism accounted poorly for the behavioral data (**Figure S4A**), largely because of its symmetry between target and foil stimuli. This symmetry ensured that if the false-alarm rate was greater than 50% in the reinforced context in a given session, the false-alarm rate could not be below 50% in the probe context, inconsistent with the behavioral data (**Figure S3A**, **Figure S4A**, *reinforced* and *probe*). A second possibility was an additive modulation equivalent to a threshold shift (**Figures S3B**)(Silver, 2010). While this mechanism provided a better fit to the data, it still did not simultaneously capture the trajectories in both contexts (**Figure S4B**, *reinforced* and *probe*), as again the readout function for target and foil trials was affected in a highly correlated manner (**Figures S3B**, **4B**). A third approach was to scale independently the drive for no-go or go responses by modulating either the gain of inhibition (**Figures 3B**, **S3C**), or the excitatory drive to the decision unit (**Figures S3D**, **S4D**). Interestingly, selectively scaling the gain of feed-forward inhibition provided the best fit of behavioral data with a small number of adjusted parameters for mice, rats, and ferrets (**Figures 3C-D**, **S2E**, **S8F**, **S9F**). This straightforward mechanism for selectively scaling the no-go response is absent in classical reinforcement learning models yet quantitatively describes the dissociation between acquisition and expression of task knowledge.

One alternative computational explanation in the case of the head-fixed mice is that the licktube-reward association supersedes the target-reward association; this would predict continuous or random licking. However, early in learning, baseline lick rates in the reinforced context were low, with a robust increase in licking after the tone (**Figure S5A-B**). Theoretically, these effects could also be mediated by a compound association, whereby the licktube provides an additive drive to lick, bringing animals closer to an internal response threshold, even if baseline lick rates are low. If this were the case, for reinforced sessions in which the hit and false-alarm rates were both below 100%, we would expect that removal of the licktube would equally reduce hits and false-alarms (i.e., subtracting the additive drive to lick by the licktube). This was not the case; our behavioral data show that false alarm rates were significantly more affected than hit rates by context switching (**Figures S5C-D**;  $\Delta\text{Target} = 14.9 \pm 18.7\%$ ,  $\Delta\text{Foil} = 48.6 \pm 18.7\%$ ,  $p = 2.79 \times 10^{-5}$ ). Moreover, in the experiments with freely-moving rats, the food cup was always present with only the reinforcer (i.e., food pellets) either being present or absent; a compound association

would thus impact both contexts. Similarly, in the lever-based task in head-fixed, the licktube was always absent in both the reinforced and probe context, except to deliver water for correct licking to the target tone in the reinforced context. A compound association cannot explain the behavioral results since there is no licktube present when the animal executes the operant lever press. Taken together, these data largely negate the possibility of a compound association as the likely mechanism.

What contextual factors might be responsible for this? Some context-dependent responses may be maladaptive; for example, impulsivity or over-motivation may hasten the response function by reducing inhibition under motivated conditions. Interestingly, animals responded more quickly in the reinforced context (**Figure S6**) suggesting that impulsivity may be one such contextual factor. Others may be adaptive such as increased foraging and exploration early in learning in the presence of reinforcement, which in the case of our mouse task would drive an increase in false alarm rate. Computing the reward rate shows that non-discriminant licking in the reinforced context to both target and foil tones maximizes reward at early stages of training (**Figure S7**). Thus, both adaptive and maladaptive factors likely contribute to context-dependent scaling.

# **Inter-individual variability is driven more by testing context than underlying sensorimotor abilities**

One challenge in evaluating behavioral data and building robust learning models is that learning curves appear highly variable across individual animals (Bathellier et al., 2013; Luksys et al., 2009) and humans (Wu et al., 2014). Typically, this variability has been thought to arise from differences in how quickly animals learn stimulus-action associations; “smarter” animals make associations faster, represented in formal reinforcement learning models via parameters related to reward-based plasticity. We examined individual animal learning trajectories in animals in which we collected both reinforced and probe behavioral performance consistently during learning (N=7 mice, N=6 rats). We found that selective scaling of the decision read-out could capture parallel behavioral trajectories of individual mice and rats with high fidelity (**Figures 3D-F, S8-9**). As expected, mice exhibited significant behavioral variability in how quickly they reached expert levels in the reinforced context (**Figure 4A**, left panel). Surprisingly, in the probe context, this variability was strongly suppressed, revealing that different animals had acquired task

knowledge at nearly identical rapid rates (**Figure 4A**, right panel). We quantified this by calculating the number of trials it took mice to reach expert performance and the variance of this between animals (**Figure 4B**,  $d' > 2.0$  with false-alarm rates  $< 50\%$  for 100+ trials). Probe learning trajectories were stereotyped across animals while reinforced learning trajectories were much more variable (**Figure 4B**). For rats, the inter-animal variability in learning rates was also much lower in the probe context than in the reinforced context (**Figure 4C-D**) further emphasizing the generalizability of our findings across species.

We tested in our model whether the inter-individual variation in performance was primarily explained by variability in reward-based plasticity parameters or variability in contextual scaling of the decision readout. To do so, we utilized a one-factor-at-a-time approach to examine how much each parameter could alter the learning curve versus how much real learning curves differed. Interestingly, the contextual scaling of inhibition could explain nearly all of the variation in performance in the reinforced context while reward-based plasticity parameters (learning rates, initial conditions, and noise) were less explanatory (**Figure 4E, F**). Individual performance variance therefore appears to emerge more from contextual factors than from differences in underlying rates of associative learning.

## DISCUSSION

In the 1930s, Edward Tolman and colleagues elegantly demonstrated that the introduction of reinforcement can critically mediate the generation and expression of a “cognitive map” (Tolman, 1948; Tolman and Honzik, 1930). Since its inception, Tolman’s cognitive map hypothesis of has profoundly impacted how neuroscience and behavioral psychology think about and approach cognitive behaviors. In the intervening years, however, this behavioral manipulation (introduction and removal of reinforcement) has rarely been used to understand sensory-guided behaviors. Here, we show that this simple yet powerful behavioral manipulation can dissociate between the acquisition and expression of sensorimotor task knowledge during learning. Across a wide range of behavioral tasks and animal species, we demonstrate that the apparent lack of discrimination between two conditioned stimuli early in learning can be attributed to contextual factors rather than underlying knowledge. Access to reinforcement masked the ability to execute correct stimulus-action associations, which can be revealed simply by testing animals in a different context where the reinforcement is absent. This hidden learning appears to be faster and highly stereotyped across animals, indicating that apparently-robust inter-individual differences in the presence of reinforcement are not driven by inter-individual differences in sensorimotor abilities.

In these sensorimotor behaviors, the acquisition of task knowledge likely operates via reward-based plasticity from a sensory to decision-making population. These projections rapidly stabilize and enable discrimination between the action values of the stimuli. Interestingly, neural data acquired during learning suggests that perhaps this rapid learning of stimulus-action associations may be reflected in sensory cortex. In the primary visual cortex of mice, for example, neural sensitivity to trained stimuli increases well before “behavioral” improvements (Jurjut et al., 2017). These behavioral measurements, however, were performed in the testing context suggesting that an alternate measure of behavior, such as our probe context, may have shown that the neuronal sensitivity tracks sensorimotor task acquisition (i.e., probe context learning rate) but precedes task expression (i.e., reinforced context learning rate) in the testing context. Thus, rapid changes in V1 may reflect core task learning while performance-correlated neural changes observed in other studies (Makino and Komiyama, 2015; Poort et al., 2015) reflect a more complex mix of contextual factors including behavioral state and cost-benefit

considerations. The relative timing of neural changes versus behavioral improvements has profound implications for neural models of learning and the underlying neural implementation, particularly as it relates to how specific brain structures instruct versus permit plasticity (Kawai et al., 2015; Otchy et al., 2015). Similar re-interpretations of existing results (Chu et al., 2016; Huber et al., 2012; Kato et al., 2015) may help us improve our understanding of the population-level and single-neuron dynamics during learning across sensorimotor regions.

The circuit mechanism of reward-based plasticity of sensorimotor projections is a critical area for future exploration. Dopaminergic neurons have been implicated in calculating reward prediction error (Schultz et al., 1997) yet whether and how these signals propagate to sensory cortices remains unclear. One possibility involves the entrainment of a neuromodulatory system with broader cortical projection patterns, such as cholinergic projection neurons in the basal forebrain (Zaborszky et al., 2015). Recent work in trained animals suggests that the cholinergic projection systems signals reinforcement feedback in a phasic manner (Hangya et al., 2015). Future studies will explore how phasic cholinergic signals are involved in learning-related plasticity and the forms of behavioral changes documented here.

Our model further suggests that task expression is influenced by contextual scaling of the decision-making population. What might be the neural implementation of this contextual scaling? The state-dependent nature of the behavioral transitions and the potential role of inhibition suggest that neuromodulation, e.g., acetylcholine or noradrenaline, may be involved. Moreover, prefrontal mechanisms of top-down control may also play a role in stabilizing behavior in the presence of reinforcement. Behaviorally isolating the underlying learning rates and drivers of variability, however, will be critical if we want to link behavioral output, the computational algorithms that enable this output, and the relevant neural implementations (Krakauer et al., 2017; Wright and Shea, 1991).

More broadly, the dissociation between knowledge and expression has critical implications for how we understand the distributed computations that enable learning. The possibility that acquisition and expression rely on different physiological mechanisms may help us isolate the root causes of under-performance and variability in learning rates. This dissociation may be particularly relevant when motivation, anxiety, and arousal are high and intermingled.

374 Regardless, behavioral and theoretical dissociation of acquisition and expression of knowledge in  
375 learning now provides us with a conceptual framework to better explore the neural basis of  
376 learning and individual variability. The possibility of distinct mechanisms between acquisition  
377 and expression may help us identify the neural basis for learning and performance variability  
378 across a wide range of behavioral, perceptual, cognitive, and intelligence testing contexts,  
379 including possibly in humans.



# FIGURES

**Figure 1**

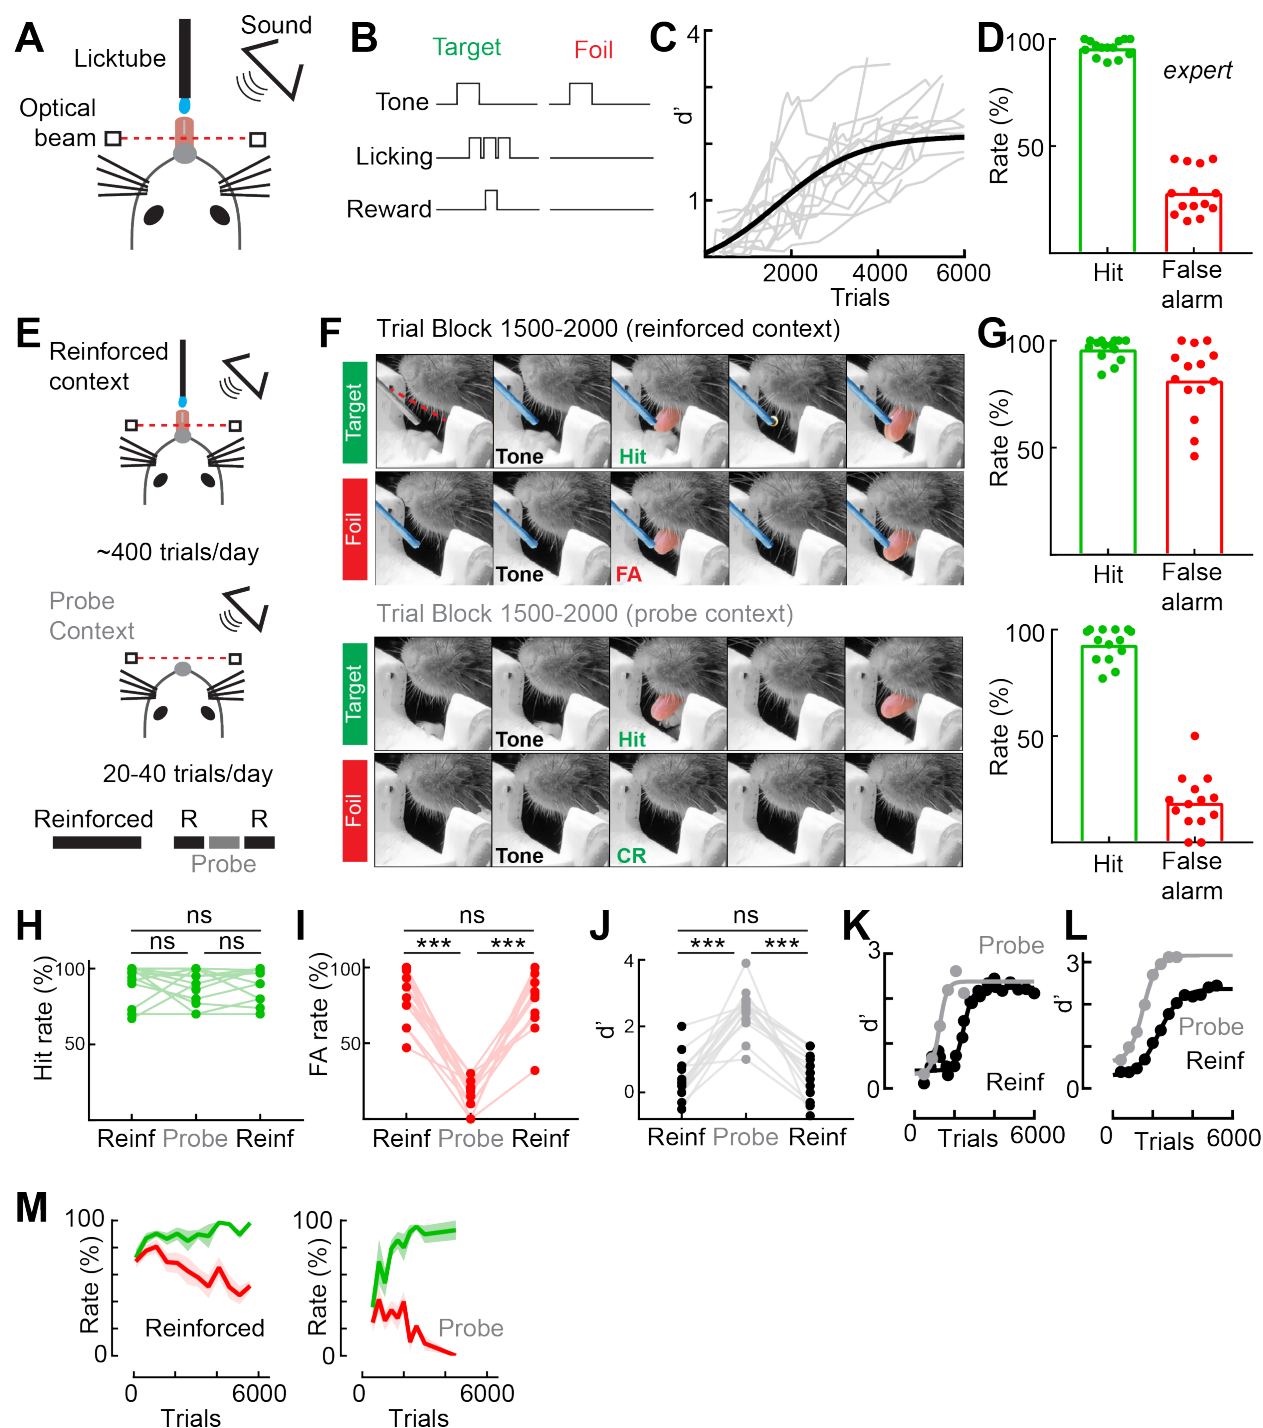

**Figure 1.** Expression of underlying task knowledge is context-dependent. **A**, Behavioral schematic of task set-up in the reinforced context with the licktube present. **B**, Mice are trained to lick to the target tone for a water reward and to withhold from licking to the foil tone. **C**, Behavioral sensitivity ( $d'$ ) as a function of the number of reinforced trials (max  $d'$ :  $2.7 \pm 0.2$ , mean  $\pm$  sem,  $N=14$  mice, black line is sigmoidal fit to the average of all animals). **D**, Hit and false-alarm rates of individual animals at peak performance rates (hit rate:  $96.0 \pm 0.9\%$ , mean  $\pm$  sem,  $N=14$  mice; false-alarm rate:  $28.0 \pm 2.9\%$ , mean  $\pm$  sem). **E**, Top: same as **A**, mice predominantly undergo training in the reinforced context. Middle: 20-40 probe trials are interleaved with reinforced training each day. In the probe context, the licktube was removed and there was no reinforcement for target or foil trials. Bottom: typical daily training structure, 200-300 reinforced trials followed by 20-40 probe trials, and a final 70-200 reinforced trials. **F**, Still-frames from a behavioral movie in a typical training session around trials 1500-2000. Reinforced context (licktube present); mouse correctly responding to a target tone in the reinforced context with a lick, water reward delivered in frame 4; mouse erroneously responding to a foil tone in the reinforced context with a lick. Probe context (no licktube present, same session): mouse correctly responding to a target tone in the probe context with a lick; mouse correctly withholding a response to a foil tone in the probe context. **G**, Top: average hit rate ( $95.8 \pm 1.4\%$ , mean  $\pm$  sem,  $N=14$  mice) and false-alarm rate ( $81.6 \pm 4.6\%$ , mean  $\pm$  sem) across trials 1500-2000 in the reinforced context. Bottom: average hit rate ( $92.8 \pm 2.1\%$ , mean  $\pm$  sem,  $N=14$  mice) and false-alarm rate ( $18.7 \pm 3.5\%$ , mean  $\pm$  sem).  $F(3,39)=198.05$ , one-way repeated-measures ANOVA followed by Tukey's post-hoc correction,  $p=0.84$  between hit rates,  $p<0.05$  for all other comparisons. **H**, Hit rates do not systematically vary with behavioral context early in learning (Trials 1500-2000, hit rates, pre-reinforced= $91.3 \pm 3.21\%$ , probe= $89.1 \pm 2.92\%$ , post-

reinforced=89.7±2.90%, mean±sem, n=14 animals;  $F(2,26) = 0.1932$ ,  $p=0.851$  between pre-reinforced and probe contexts,  $p = 0.914$  between reinforced contexts,  $p=0.973$  between post-reinforced and probe contexts, one-way repeated measures ANOVA followed by Tukey's post-hoc correction). **I**, False-alarm rate during probe trials is significantly lower than during the reinforced trials that immediately precede or follow them (Trials 1500-2000, pre-reinforced false-alarm rate: 81.9±4.5%, probe false-alarm rate: 15.5±2.7%, post-reinforced false-alarm rate: 77.7±4.9%, mean±sem, n=14 animals;  $F(2,26) = 107.8$ ,  $p<0.0001$  between reinforced sessions and probe contexts,  $p=0.548$  between reinforced contexts, one-way repeated measures ANOVA followed by Tukey's post-hoc correction). **J**, Behavioral sensitivity ( $d'$ ) is significantly higher during probe trials than in the reinforced sessions that precede or follow (Trials 1500-2000, pre-reinforced  $d'$ : 0.40±0.18, probe  $d'$ : 2.46±0.18, post-reinforced  $d'$ : 0.53±0.19, mean±sem, N=14 mice;  $F(2,26) = 44.56$ ,  $p<0.001$  between reinforced sessions and probe contexts,  $p=0.827$  between reinforced contexts, one-way repeated measures ANOVA followed by Tukey's post-hoc correction). **K**, Learning trajectories of an individual animal in the reinforced (black, n=24 training sessions) and probe (grey, n=6 training sessions) context. Dots indicate individual training sessions; lines indicate a sigmoidal fit to the behavioral data. **L**, Average  $d'$  of a subset of animals whose learning was tracked in both the reinforced (black, N=7 mice) and probe (grey, N=7 mice) contexts. Dots indicate trial bins; solid lines indicate a sigmoidal fit. Reinforced trials to expert: 4728±647 trials; probe trials to expert: 1765±108 trials; N=7 mice,  $t(6)=4.359$ ,  $p=0.0055$ . **M**, Left: average learning trajectories (mean±sem) in the reinforced context. Right: average learning trajectories (N=7 mice, mean±sem) in the probe context. Green lines indicate average hit rate, red lines indicate average false-alarm rate (N=7 mice, mean±sem)

# Figure 2

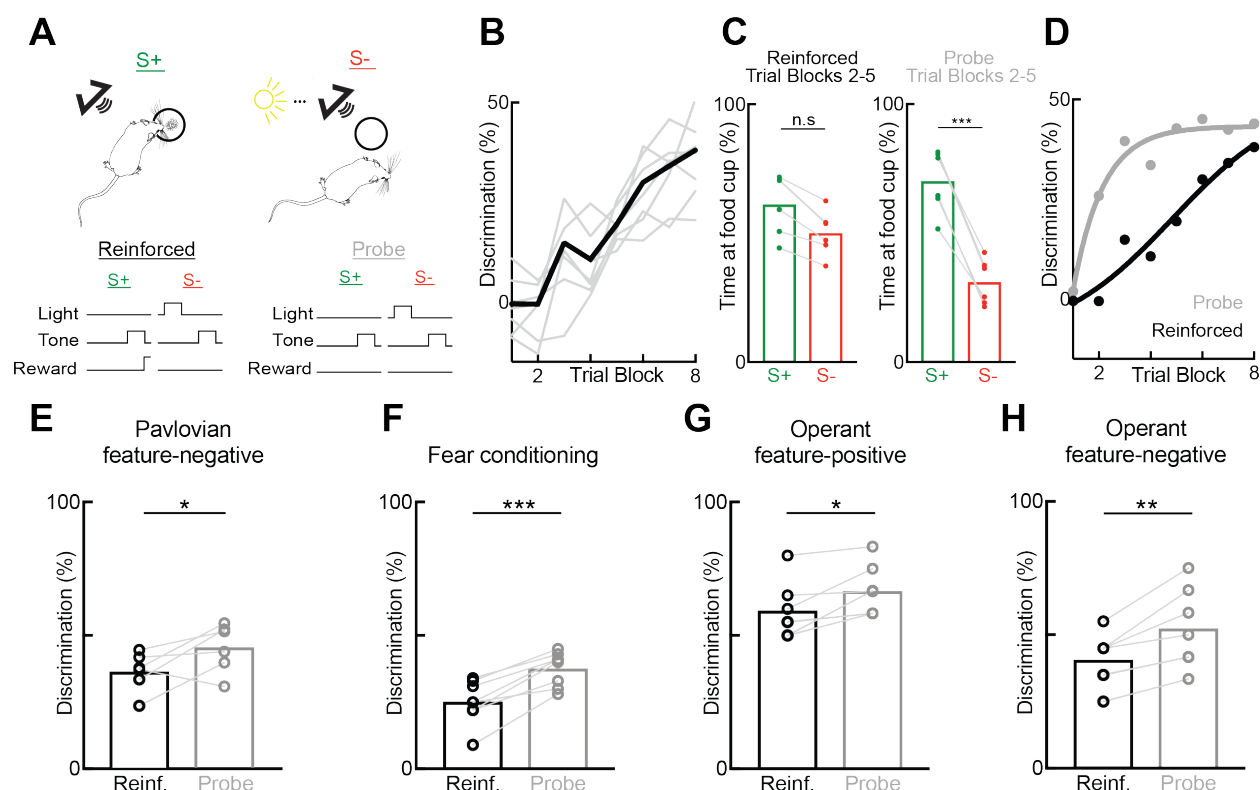

**Figure 2.** Dissociation of acquisition and expression generalizes to freely-moving rats. **A**, Behavioral schematic of task set-up in the reinforced context. Feature-negative discrimination task: a tone alone (S+) predicts the appearance of food in the food cup, whereas a light presented 5s before the tone (S-) reverses its predictive quality. Neither stimulus is rewarded during probe trials. **B**, Discrimination between stimuli as a function of trial blocks in the reinforced context; gray lines indicate individual animals, black line is the average performance across animals (peak discrimination:  $35.5 \pm 3.8\%$ , mean  $\pm$  s.e.m, N=6 rats). **C**, Left: average time spent with nose in food cup after S+ stimulus ( $61.2 \pm 4.8\%$ , mean  $\pm$  sem, N=6 rats) and S- stimulus ( $50.1 \pm 3.5\%$ , mean  $\pm$  sem) across trial blocks 2-5 in the reinforced context. Right: average time spent with nose in food cup after S+ stimulus ( $70.1 \pm 4.9\%$ , mean  $\pm$  sem, N=6 rats) and S- stimulus ( $31.0 \pm 3.6\%$ , mean  $\pm$  sem) across trial blocks 2-5 in the probe context.  $F(3,20)=15.49$ , one-way repeated-

measures ANOVA followed by Tukey's post-hoc correction,  $p=0.84$  between S+ rates,  $p = 0.39$  between reinforced S+ and S- rates,  $p<0.05$  for all other comparisons. **D**, Average discrimination of animals in the reinforced and probe contexts as a function of trial blocks. Dots indicate experimental data averaged across all rats, lines are the least-squares sigmoidal fit. **E**, Discrimination between S+ and S- stimuli for rats fully trained (trial block 8) on the Pavlovian serial feature discrimination task in **A**. Rats discriminated significantly more between the S+ and S- during non-reinforced probe trials (Reinforced discrimination:  $33.8\pm3.4\%$ , mean $\pm$ s.e.m.,  $N=6$  rats; Probe discrimination:  $43.2\pm3.7\%$ , mean $\pm$ s.e.m.; two-tailed Student's paired t-test,  $t(6) = 2.693$ ,  $p=0.036$ ). **F**, Discrimination of rats in a fear-conditioning based feature negative discrimination task. Rats were first trained to press a lever for sucrose reinforcement feature. Pavlovian fear conditioning procedures were then superimposed on this operant lever pressing baseline. When a tone target stimulus was presented alone (S+), it was paired with foot shock, but not when it was presented following a light feature (S-). Fear conditioning was assessed by measuring the suppression of operant lever press responding during the tone, and discrimination as the difference in suppression ratio to the S+ and S-. All rats discriminated significantly more between stimuli in the probe context than in the reinforced context (Reinforced discrimination:  $25.1\pm2.4\%$ , mean $\pm$ s.e.m.,  $N=8$  rats; Probe discrimination:  $37.6\pm3.1\%$ , mean $\pm$ s.e.m.; two-tailed Student's paired t-test,  $t(7) = 7.349$ ,  $p=1.56\times10^{-4}$ ). **G**, Performance of rats in a operant ambiguous feature discrimination in both reinforced and probe contexts to the feature positive portion of task. In this task, a single light feature stimulus indicated both that sucrose reinforcement was available for lever pressing during a tone target stimulus and that reinforcement was not available during a white noise stimulus. **C** Shows the discrimination of individual rats on the feature-positive portion of trials (i.e., light + tone vs. tone alone). Rats

468 discriminated significantly better in the probe context than in the reinforced context (Reinforced  
 469 discrimination:  $59.2 \pm 4.0\%$ , mean $\pm$ s.e.m., N=7 rats; Probe discrimination:  $66.6 \pm 3.6\%$ ,  
 470 mean $\pm$ s.e.m.; two-tailed Student's paired t-test,  $t(6) = 3.15$ ,  $p=0.020$ ). **H**, Performance of rats on  
 471 the same task as **c** on the feature negative discrimination portion (i.e., light + noise vs. noise  
 472 alone). Rats discriminated significantly better in the probe context than in the reinforced context  
 473 (Reinforced discrimination:  $40.71 \pm 3.7\%$ , mean $\pm$ s.e.m., N=7 rats; Probe discrimination:  $52.4 \pm 5.$   
 474  $7\%$ , mean $\pm$ s.e.m.; two-tailed Student's paired t-test,  $t(6) = 4.534$ ,  $p=0.004$ ).  
 475

**Figure 3**

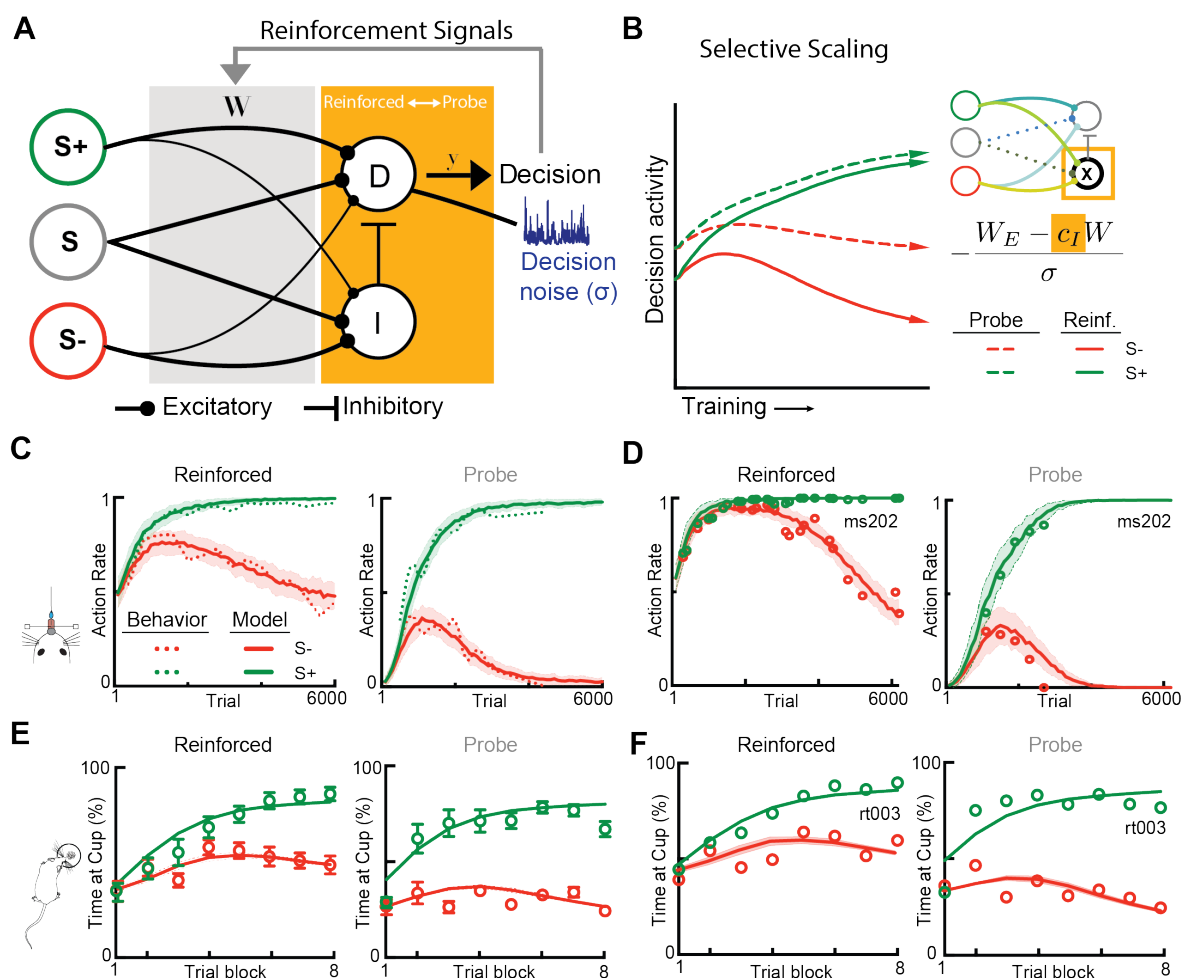

**Figure 3.** Contextual scaling in a reinforcement learning model. **A**, Schematic of the model, which implements reinforcement-driven learning of stimulus-action associations, with a readout function that can be contextually modulated. The model simultaneously captures reinforced and probe learning trajectories by dissociating between reward-driven plasticity representing task acquisition (gray, reinforcement signals) and context-dependent changes in expression (orange, contextual scaling) of the learned values. Plastic synapses between sensory and decision-making populations represent stimulus-action values, and their weights are only updated during reinforced trials (gray shading, reinforcement signals). Actions are generated by the decision-making (D and I) units (orange shading), which read out the sensory input filtered through the

synaptic weight matrix ( $W$ ). The parameters of the readout units (orange shading) are modulated between the reinforced and the probe contexts, either via selective scaling of inhibition and excitation, noise modulation, or threshold changes (see **Figure S3**). **B**, Right: illustration of the effects of selective scaling of inhibition on the decision unit's activity ( $D$ ). Decision activity represents the net input to the decision-making unit, i.e. the difference between the values of the go and no-go actions, for the target (green) and foil (red) tone over the course of learning. Solid and dashed lines respectively indicate probe and reinforced context (inhibition scaling  $c_I$ : 0.52). Left: schematic of the contextually modulated model via inhibitory scaling, and a description of how inhibitory scaling would be implemented. Orange highlights the context-dependent parameters. **C**, Comparisons between average mouse behavioral data ( $n = 7$  mice) and fits of the inhibitory scaling model for the two contexts. **D**, same as **C** but for the learning trajectory of one individual mouse. **E-F**, same as **C-D**, but for rat behavioral data (**E**:  $n = 6$  rats; **F**: rat rt003).



**Figure 4**

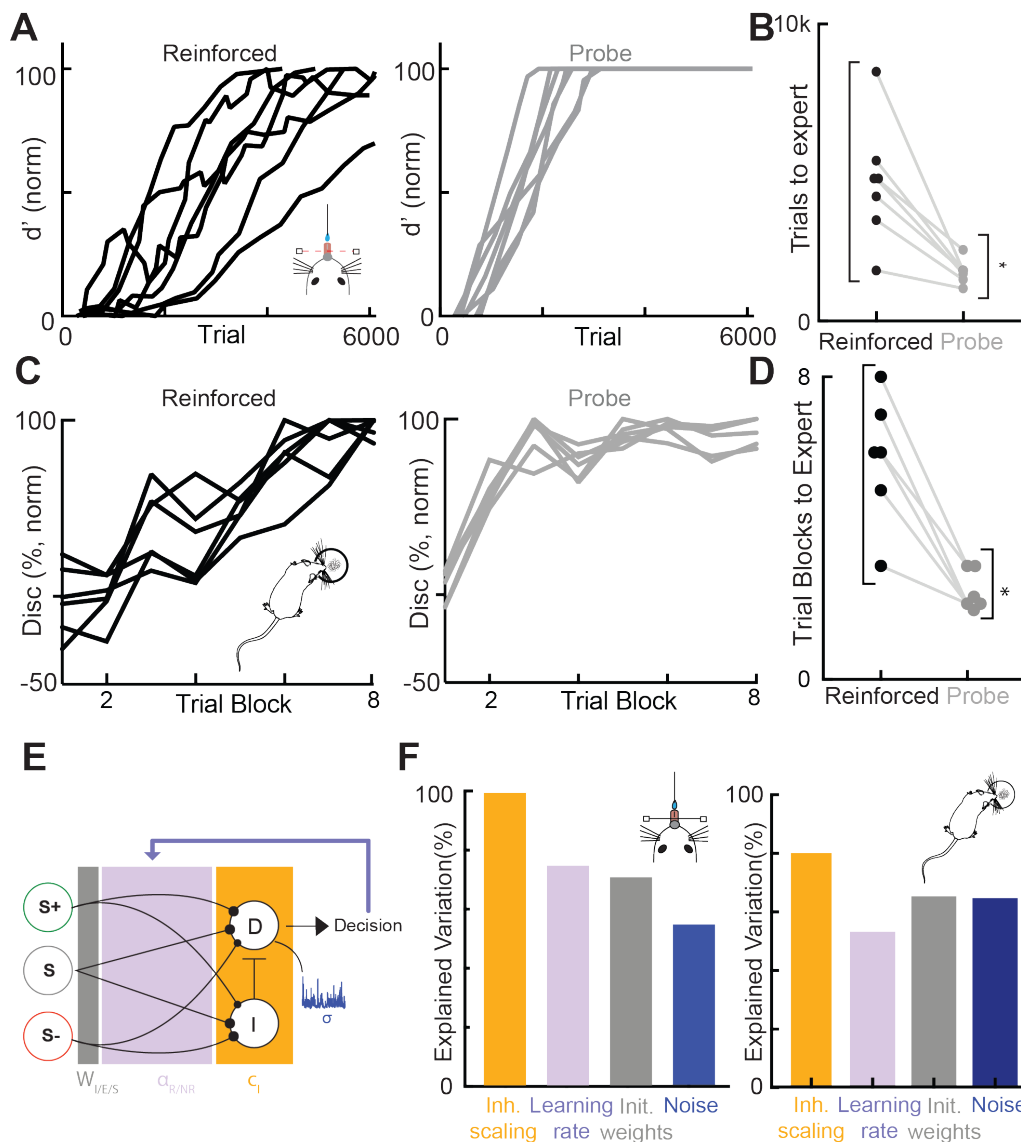

**Figure 4:** Performance variance across rodents arises from contextual factors. **A**, Left: normalized discrimination of all mice in the auditory go/no-go task over the course of learning (N=7 mice) in the reinforced context; right: same as left but in the probe context (N=7 mice). **B**, Number of trials required for individual animals to reach expert performance levels ( $d' > 2.0$ , false-alarm rate  $< 50\%$  for at least 100 trials) in the reinforced (black) and probe (grey)

508 contexts. The number of trials required for expert performance is significantly more stereotyped  
509 across animals in the probe context than in the reinforced context (probe: st.d. = 358 trials , range  
510 = 1348-2332, n =7 animals; reinforced: st.d. = 2047 trials, range = 2187-8838 trials, N=7 mice,  
511  $F(6,6) = 32.63$ ,  $p = 5.025 \times 10^{-4}$ , two-tailed two-sample F-test for equal variances). **C**, Left:  
512 normalized discrimination of rats in the Pavlovian feature-negative discrimination task over the  
513 over the course of learning (N=6 rats) in the reinforced context; right: same as left but in the  
514 probe context (N=6 rats). **D**, Number of trials required for individual animals to reach expert  
515 performance levels (discrimination > 25% for at least 1 day of training, i.e. 16 trials) in the  
516 reinforced (black) and probe (grey) contexts. The number of trials required for expert  
517 performance is significantly more stereotyped across animals in the probe context than in the  
518 reinforced context (probe: st.d. = 0.51 days, range = 2-3 days, N=6 rats; reinforced: st.d. = 1.72  
519 days, range = 3-8 days,  $F(5,5) = 11.12$ ,  $p = 0.0194$ , two-tailed two-sample F-test for equal  
520 variances). **E**, Schematic of network model with colors indicating parameter groups. **F**, Left:  
521 Percentage of inter-individual variation for mice performing the auditory go/no-go task  
522 explained by the four core model parameters: inhibitory scaling: 99.7%; learning rates: 74.8%;  
523 initial weights: 70.8%; noise: 54.6%. Each parameter is constrained by the values given by  
524 individual animal fits. Right: same as left but for modelling of rats learning the Pavlovian  
525 feature-negative discrimination task (variation explained by inhibitory scaling: 80.7%; learning  
526 rates: 53.0%; initial weights: 65.2%; noise: 60.6%. Each parameter is constrained by the values  
527 given by individual animal fits.

## **STAR METHODS**

## **CONTACT FOR REAGENT AND RESOURCE SHARING**

Further information and requests for resources and reagents should be directed to and will be fulfilled by the Lead Contact, Kishore Kuchibhotla ([kkuchib1@jhu.edu](mailto:kkuchib1@jhu.edu)).

## **EXPERIMENTAL MODEL AND SUBJECT DETAILS**

**Animals:** All mice procedures were approved under a New York University IACUC protocol and a Johns Hopkins University IACUC protocol. Male and female mice of mixed sex were used at 8-16 weeks of age. Multiple strains were used (C57/BL6, PV-cre, ChAT-ChR2). Behavior was a quantitative assessment with no "treatment" groups, and animals were thus not randomly assigned into experimental groups. The care and experimental treatment of rats was conducted according to the National Institutes of Health's *Guide for the Care and Use of Laboratory Animals*, and the protocol for "Experiment 1" was approved by an IACUC at Duke University. "Experiment 2" was conducted at the University of Pittsburgh before the establishment of IACUCs. All rats were male Long-Evans rats tested around 90 days of age. All experimental procedures involving ferrets conformed to standards specified and approved by the French Ministry of Research and the ethics committee for animal experimentation n°5. Blinding of experimenters was not relevant for this study as behavior was assessed quantitatively based on objective, measured criteria.

## **METHOD DETAILS**

**Behavioral training: head-fixed mice.** All behavioral events (stimulus delivery, reward delivery, inter-trial-intervals) were monitored and controlled by a custom-written MATLAB (MathWorks) program interfacing with an RZ6 auditory processor (Tucker-Davis Technologies), and an infrared beam for lick detection. Training was initiated after surgery for head-fixation and at least 7 days of water restriction in adult mice (8-16 weeks of age, mixed sex, mixed background strain). Training was conducted during the day and began with habituation to head-fixation, which was followed by 1-2 water-sampling sessions while animals were immobilized in a Plexiglas tube facing a licktube. The licktube was typically placed at the maximal distance away from the mouse. Animals were then immediately placed in the complete behavioral paradigm with minimal shaping. Task training began with a 200-400 trials in the reinforced behavioral context, where we used a go/no-go auditory discrimination task with the target and foil stimuli set at 9.5 kHz or 5.6 kHz (stimuli-salience pairing randomly assigned, 0.75 octave spacing). Target versus foil trials were pseudo-randomly ordered, each of which consisted of a pre-stimulus period (1.25 s), stimulus period (100 ms), delay (50 ms), response period (1.75 s), and an inter-trial interval (ITI) with variable duration as described below.

Tones were presented to animals under two different behavioral contexts. In the ‘reinforced context’, a licktube delivering water was positioned within tongue reach (0.5-1.0 cm). In this context, mice only received water for correct licks to the target tone during the response period. Incorrect licks during the response window to the foil tone (a false-alarm) resulted in a mild negative punishment consisting of an extended ITI. Animals were not punished if they licked during any other time epoch (i.e., if animals licked in the pre-stimulus period, tone presentation or delay period, the trial continued with the standard ITI). This enabled us to

confirm that animals were actively increasing lick rate for target tones during hit trials and reducing lick rate for foil tones during correct reject trials. This measurement confirmed that both the target and foil tone had behavioral effects on the animal; without this, animals could take a single-tone strategy (i.e., learn to lick only for the target tone or withhold licking for the foil tone). Hit trial ITIs were 4–5 s (to enable licking for full reward), miss trials were not punished and had an ITI of 2–3 s, false-alarm trials were punished with an ITI lasting 7–9 s, and correct rejects immediately moved to the next trial with an ITI of 2–3 s. In the second context, the ‘probe context’, the licktube was removed from the behavioral space by an automated actuator, such that it was out of sight and whisker reach. Target and foil trials were again presented in a pseudo-random order, but did not correlate to the presence of potential rewards or punishments. We continued to monitor behavioral responses made during the response period following stimulus presentation, but trial durations were not dependent on such behavioral responses (ITI ~2-3 s).

Each day, animals were typically trained on two blocks of trials in the reinforced context (100-300 each, total of ~400 reinforced trials per day), and one randomly interleaved block of probe trials (20-40 trials). Importantly, because mice were not presented with any direct incentives to execute behavioral responses in the probe contexts, the number of trials in probe blocks could not be further extended, as this caused rapid cessation of behavioral responses. Utilizing the short probe blocks, behavioral responses (hit rate and false-alarm rates) in the probe context (i.e. in the absence of reinforcement) began to decline after 60-150 total passive trials across 3-6 days of training. For a subset of mice (N=4), we introduced probe blocks more sparsely (~1 probe block per 1500 reinforced trials) to ensure that the decline of behavioral

responses in the probe context occurred independently from the training in the reinforced context.

Average performance in the reinforced condition was measured by segmenting performance into discrete blocks, such that we averaged all false-alarm and hit rates recorded in blocks of 100 trials. A similar process was utilized for measurements of average performance in the probe context, but because of the smaller number of probe blocks, block sizes were adjusted to ensure that probe blocks from at least two animals were incorporated into each measurement (max 500 trials/block). For analysis of probe learning trajectories, we only included probe blocks up until the hit rate reached a peak value, as behavioral responses in the probe context were subsequently diminished because of the absence of a positive reinforcer. Behavioral sensitivity ( $d'$ ) to the task-relevant tones was calculated as the  $z$ -scored hit rate minus the  $z$ -scored false-alarm rate. To avoid infinite values during sensitivity calculations rates of zero and one were corrected by  $\frac{1}{2N}$  and  $1 - \frac{1}{2N}$ , respectively, where  $N$  is the number of trials in each measurement.

For the lever-pressing task, the licktube was normally absent and mice were initially trained to reliably press the lever for access to the licktube. After this initial period of lever training, the animals were then placed into the go/no-go task with no additional behavioral shaping. The task structure was similar to the lick-version of the task described above but now a lever press was required for the motor action and the licktube was only advanced for correct target trials (hit trials) in the reinforced context.

**Behavioral training: rats.** The subjects ( $N=7$ ) of the Pavlovian serial feature negative discrimination task (**Figure 2A**) were male Long-Evans rats (Charles River Laboratories, Raleigh, NC, USA). Rats were housed individually in a colony room with a 4:10 hr light-dark

cycle. After one week of acclimation to the vivarium with ad libitum access to food and water, rats were food-restricted such that their weights reached and were maintained at 85% of their free-fed weights. Beginning three days before the first day of food restriction, all rats were handled, weighed, and fed daily until the end of the experiment. For all rats, daily behavioral testing sessions began 7 days after the beginning of food restriction, and were conducted during the light portion of the light-dark cycle. The rats were tested at about 90 days of age. The animal protocols were approved by an IACUC at Johns Hopkins University.

For the Pavlovian serial feature negative discrimination task, the behavioral training apparatus consisted of eight individual chambers (22.9 x 20.3 x 20.3 cm) with stainless steel front and back walls, clear acrylic sides, and a floor made of 0.48-cm stainless steel rods spaced 1.9 cm apart. A food cup was recessed in a 5.0 x 5.0 cm opening in the front wall, and photocells at the front of the food cup recorded time spent in the cup. Grain pellets were delivered to the food cups by pellet feeders (Coulbourn H14-22, Allentown, PA, USA). A jeweled 6-w signal lamp was mounted 10 cm above the food cup; illumination of this “panel light” served as the visual stimulus. Each chamber was enclosed inside a sound attenuating shell. An audio speaker and 6-w house light were mounted on the inside of each shell.

All rats were first trained to eat grain pellets (45 mg, Formula 5TUM, Test Diets, Richmond, IN, USA) from the food cups, in a single 64-min session, which included 16 unsignaled deliveries of 2 pellets each. In this and all subsequent session, events were delivered at random inter-trial intervals (ITIs, mean: 4 min, range: 2 to 6 min). Then, the rats received a single 64-min pre-training session, which included 16 reinforced trials; each trial consisted of a 5-s presentation of a 78 dB SPL, 1500 Hz square wave tone followed immediately by the delivery of 2 grain pellets. Finally, the rats received eight 64-min daily training sessions, each

including 4 reinforced trials (S+; as before) and 12 foil trials (S-), in which a 5-s illumination of the panel light was followed, after a 5-s empty interval, by the 5-s tone, but no food delivery. The trials occurred in random order, changed daily. Four hours before each of training sessions 2-8, and 20 hr after session 8, rats received a probe test, which comprised two light-tone and 2 tone-alone trials. No food was delivered in these tests. Responses to each stimulus type was recorded as the percentage of the food-sampling window (5 s post-stimulus) rats spent in the food cup. Performance, or discrimination, was recorded as the raw difference rats spent in the food cup following the S+ versus S- stimulus. Expert performance levels was defined as a discrimination > 25% for at least 1 day of training, 16 trials.

The operant ambiguous feature discrimination task (“Experiment 1”; **Figure 2A-E**) and the fear conditioning (conditioned suppression) in feature-negative discrimination task (“Experiment 2”; **Figure 2B**) have been previously described in detail (Gallagher and Holland, 1992; Holland and Lamarre, 1984). The subjects of Experiment 1 (N=7) were male Long-Evans rats (Charles River Laboratories, Raleigh, NC, USA) and the subjects of Experiment 2 were 4 males and 4 female Sprague-Dawley rats (bred at the University of Pittsburgh). The rats in Experiment 1 received sham lesions of the hippocampus (Gallagher & Holland, 1992) prior to training procedures. Rats were individually housed in a colony room with a 12:12 hr light-dark cycle. All rats were carefully food-restricted to maintain 85% of their free-feeding weights, as described above. The care and experimental treatment of rats was conducted according to the National Institutes of Health’s *Guide for the Care and Use of Laboratory Animals*, and the protocol for Experiment 1 was approved by an IACUC at Duke University. Experiment 2 was conducted at the University of Pittsburgh before the establishment of IACUCs. The training apparatus for these experiments was identical to the chamber-divided box described above, with



sucrose solution being delivered to the food cup via solenoid valves. A 2.5 x 2.5 cm response lever was mounted 2 cm left of the food cup.

*Experiment 1.* This experiment was designed to assess performance in a discrete-trial operant ambiguous feature discrimination. A single light feature stimulus indicated both that sucrose reinforcement was available for lever pressing during a tone target stimulus and that reinforcement was not available during a white noise stimulus. Thus, the rats were trained with a discrimination procedure in which lever presses were reinforced during a light + tone compound, but not during that tone alone, and during a noise when it was presented alone but not during a compound of light and noise. Rats were first trained to consume sucrose reinforcement from the food cups and to press the lever. In the initial session, they first received 20 response-independent 0.3-mL deliveries of 6.4% (v/v) sucrose (the reinforcer used throughout this experiment) on a variable-time 1-minute schedule. Each lever press was reinforced during that 20-min period and during the remaining 40 min of the session. In the next session, lever presses were reinforced, but there were no response-independent sucrose presentations; each rat was allowed to remain in its chamber until it had made about 50 lever presses. All subsequent training sessions were 60 min in duration.

The next 5 sessions were designed to establish lever pressing during the two reinforced stimuli, light (PT+) and a white noise stimulus (N+). During each of these sessions, there were 30 15 s presentations of a 73 dB SPL white noise (N) and 30 15 s presentations of a compound that comprised a 74 dB SPL 1500 Hz tone and the illumination of the panel light (PT). In the first 2 sessions, each lever press made during one of these cues was followed by sucrose delivery. In the remaining sessions (of both this and subsequent phases), reinforcement was available only during the final 5 s of each reinforced cue. During all

sessions throughout this experiment, trial sequences were generated randomly for each session. Inter-trial intervals were randomized daily, with the constraint that the range of intervals was from 0.5 to 2.0 times the mean interval (60 s).

Next, discrimination training began, in which illumination of the panel light (P) indicated the availability of reinforcement during the tone (T) and the nonavailability of reinforcement during the noise (N). All rats received four kinds of trials in each of the 20 discrimination sessions. Reinforced PT+ and N+ trials were identical to those received previously. In addition, there were 15-s presentations of the tone alone (T-), and of a compound of the panel light and the noise (PN-). In each of sessions 1-10 there were 15 of each trial type, randomly intermixed, and in each of sessions 11-20 there were 10 N+, 10 PT+, 20 PN-, and 20 T- trials. After the 20 discrimination sessions, a single non-reinforced probe test was given, which included 12 presentations of each of these trial types, plus 12 15-s presentations of P alone, to assess conditioning established to that stimulus.

*Experiment 2:* The experiment was designed to assess learning of a serial feature negative discrimination in a conditioned suppression experiment. Rats were first trained to press a lever for sucrose reinforcement feature. Pavlovian fear conditioning procedures were then superimposed on this operant lever pressing baseline. When an auditory stimulus (pure tone) was presented alone, it was paired with foot shock; when it was presented following a visual stimulus (light flash), no shock was delivered. Fear conditioning was assessed by measuring the suppression of operant lever pressing during the tone. Rats were first trained to consume the sucrose reward (0.3 ml of 8% v/v sucrose solution) from the food cup in 2 60-min sessions. In each of these sessions, there were 60 sucrose deliveries delivered on a variable-time 60-s schedule. Next, a single lever press training session was given, in which each lever press was

followed by sucrose delivery; each rat was removed from the chamber after approximately 50 presses. Then, to establish strong operant baseline lever-press responding, the rats received a single session in which lever presses were reinforced on a variable-interval 60-s schedule, followed by 4 sessions in which lever-pressing was reinforced on a variable-interval 120-s schedule. These and all subsequent sessions were 90 min in duration. No other stimuli were delivered.

Pavlovian fear conditioning began with two 90-min sessions designed to establish conditioned suppression to the target cue to be used in discrimination training and another cue to be used in a transfer test. Each session included one 1-min presentation of an intermittent (2 Hz) 1,500-Hz tone and one 1-min presentation of a white noise, each reinforced with a 0.5-s, 0.5-mA shock. During the first 45 min of the next session the rats received 3 non-reinforced presentations of a 1-min illumination of the house light as a pretest of responding to that feature cue. Discrimination training began in the last 45 min of that session. The rats received a single 1-min tone presentation that is rewarded and 3 non-rewarded presentations of a serial compound consisting of a 1-min presentation of the house-light followed by the 1-min tone. During the remaining 47 discrimination training sessions, the rats received two rewarded tone presentations and six non-rewarded presentations of the light-tone compound. The trial sequences were randomized and changed daily; the inter-trial intervals averaged 11 min, ranging from 6 to 18 min. Finally, all rats received a non-reinforced probe test which examined responding to the tone and noise exciters and to serial compounds of those exciters with the light (2 presentations each of the tone, the noise, the light+tone compound and the light+noise compound). No shocks were delivered during this test regardless of stimulus identity. Because the light+noise trials were unique to the probe test, we present data only for the tone and light+tone trials. The measure of

conditioning was a standard suppression ratio(Annau and Kamin, 1961) computed by dividing the lever-press response rate during CS presentations by the sum of response rates during CS presentations and for 2 min prior to CS presentations. Discrimination performance was measured by constructing a difference score, suppression during the tone on light+tone compound trials minus suppression on tone-alone trials.

For both Experiments 1 and 2, we examined only performance in the reinforced and non-reinforced contexts at the end stages of training, as probe trials were not conducted over the entire course of training.

**Behavioral training: ferrets.** All experimental procedures conformed to standards specified and approved by the French Ministry of Research and the ethics committee for animal experimentation n°5. Adult female ferrets were housed in pairs in normal outside light cycle vivarium. After headpost implantation, ferrets were habituated to head-fixed holder for a week. They were then trained until they reached performance criterion. Two adult female ferrets were trained to discriminate 1.1 s-long click trains in different paradigms (one on low vs. high rate click train discrimination and the other on regular vs. irregular click train) in a Go/No-Go task under appetitive reinforcement. The first ferret was trained to discriminate between a high-frequency (24Hz) foil stimulus and a low-frequency (4Hz) target stimulus, with a response window of 1.85 sec following the stimulus presentation, and performance was tracked in both contexts throughout learning. The second ferret was trained to discriminate between a 12Hz irregular click-train (foil) and a 12Hz regular click-train (target), with a response window of 0.8 sec following stimulus presentation. Performance on probe versus reinforced trials were only assessed at an early stage of training (trial 1-1150). Animals were rewarded with water (0.2 mL)

for licking a waterspout in the response window. Licks during the foil response window were punished with a timeout, as well as licks during the earlier part of the target click train (Early Window). We present and model only the learning trajectory of the first ferret, but we note that average behavioral performance was similar across animals.

All sounds were synthesized using a 100 kHz sampling rate, and presented through a free-field speaker that was equalized to achieve a flat gain. Clicks were mono-polar, rectangular pulses of 1ms duration with amplitude set at 70 dB SPL. Behavior and stimulus presentation were controlled by custom software written in Matlab (MathWorks). Target and foil stimuli were preceded by an initial silence lasting 0.2 s (Ferret 1) and 0.5 s (Ferret 2) followed by the 1.1 s-long click trains. On each session, foil and target stimuli were randomly presented and kept constant through training.

**Reinforcement learning model.** We constructed a decision-making model that implements reinforcement-driven learning of stimulus-action associations (Bathellier et al., 2013), with a readout function that can be contextually modulated. The core model consisted of a sensory coding population which sends excitatory projections to a decision-making population through feed-forward inhibition (**Figure 3A**). The sensory population consists of two tone-selective populations representing target (S+) and foil tones (S-), and one additional population that is tone-responsive but has no preference for targets or foils (S), consistent with the functional organization of auditory cortical networks (Issa et al., 2014; Kuchibhotla et al., 2016; Polley et al., 2006; Rothschild et al., 2010; Winkowski and Kanold, 2013). The non-selective sensory population (S) captures any generalized stimulus-action associations, and greatly improves

model performance. The three sensory populations projected to inhibitory (I) and excitatory populations (D) with plastic synapses in the decision-making area. The strengths of these synapses changed through reward-driven plasticity on a trial-by-trial basis; in reinforcement learning terms, the synaptic weights here represented the action values of the stimuli. The excitatory decision-making unit read out and compared the values of the two actions (Go and No-Go) by computing total synaptic input, i.e., the difference between direct excitation for a Go response, and feed-forward inhibition that promotes a No-Go response. This total input corresponded to a decision variable, which the decision-making unit transformed into an action through a noisy all-or-none activation function.

Sensory representations were assumed fixed during learning, and thus this layer formally reduces to a binary 3D vector  $\vec{x} = [S \ S+ \ S-]$  (i.e. the sensory representation layer can be represented as  $[1 \ 0 \ 1]$  during a foil trial). The instantaneous strengths of the projections from the sensory layer to the decision layer are determined by two 3D weight vectors,  $\vec{W}_D = [w_{D/S} \ w_{D/S+} \ w_{D/S-}]$  and  $\vec{W}_I = [w_{I/S} \ w_{I/S+} \ w_{I/S-}]$ . We assumed that initial weights from the two tone –selective units were identical, but allowed the initial weights from the non-selective population to be independently determined. The inhibitory unit provides graded linear feed-forward inhibition to the decision unit. The decision unit reads out the utility values of the two possible actions, Go or No-go, by computing its net synaptic input. The probability of generating a Go decision is given by

$$P(y = 1 | \vec{x}) = \frac{1}{1 + \exp(-(\vec{W}_D \vec{x}^T - \vec{W}_I \vec{x}^T) \sigma^{-1})}$$

where  $\sigma$  is a parameter that regulates the stochasticity of behavioral decision making, analogous to the temperature parameter in canonical reinforcement models. We denote by  $y$  the output of the decision unit, with  $y=1$  for a Go and  $y=0$  for a No-Go.

Synaptic weights from the sensory to the decision-making layer were updated at the end of each trial on the basis of the obtained reinforcement. Because of the relatively slower change in false-alarm rates than hit rates, we allowed the synaptic changes following rewarded and non-rewarded trials to have different learning rates  $\alpha$  and  $\alpha_{NR}$ . To account for the learning delay observed in many individual animals, we followed Bathellier et al. (2013) and utilized a multiplicative learning rule in which the learning rates are multiplied by synaptic strengths, so that strong synapses are updated more rapidly than weak synapses (**Figure S10A**). This multiplicative rule enabled the model to capture both exponential and sigmoidal learning trajectories, and predicts that the initial weights between the sensory representation layer and the decision circuitry regulates the general shape of learning trajectories for individual animals (Bathellier et al., 2013). An additive model failed to account for the learning trajectories of individual animals (**Figure S10B**). Taken together, synaptic weights are strengthened and weakened according the following learning rules:

$$\begin{aligned} \text{Rewarded trials : } \delta \vec{W}_{D,j} &= \alpha \vec{W}_{D,j} \left( R - \kappa^{-1} (\vec{W}_D \vec{x}^T - \vec{W}_I \vec{x}^T) \right) y \\ \delta \vec{W}_{I,j} &= -\alpha \vec{W}_{I,j} \left( R - \kappa^{-1} (\vec{W}_D \vec{x}^T - \vec{W}_I \vec{x}^T) \right) y \end{aligned}$$

$$\begin{aligned} \text{Unrewarded trials : } \delta \vec{W}_{D,j} &= \alpha_{NR} \vec{W}_{D,j} \left( R - \kappa^{-1} (\vec{W}_D \vec{x}^T - \vec{W}_I \vec{x}^T) \right) y \\ \delta \vec{W}_{I,j} &= -\alpha_{NR} \vec{W}_{I,j} \left( R - \kappa^{-1} (\vec{W}_D \vec{x}^T - \vec{W}_I \vec{x}^T) \right) y \end{aligned}$$

where  $R$  represents the reward (-1 if not rewarded, 1 if rewarded),  $\kappa$  is a parameter that regulates the asymptotic weights of each synapse, and  $y$  is a Hebbian term that requires co-activation of pre- and post-synaptic terminals for synaptic modifications, as it does not provide any update if the decision neuron does not activate. During stochastic runs of the model, the target and foil stimuli were generated pseudorandomly with equal probability.

To account for the distinct learning trajectories in the reinforced context and the probe context, we extended the original model and introduced a 2D binary context vector  $\vec{s}$ , indicating whether the licktube was present [1 0] or absent [0 1]. For the inhibitory scaling model, feed-forward inhibition was scaled during reinforced trials during by the 2D vector  $\vec{c}_I = [c_{I(reinforced)} \ 1]$ , such that:

$$P(y = 1 | \vec{x}) = \frac{1}{1 + \exp(-(\vec{W}_D \vec{x}^T - (\vec{c}_I \vec{s}^T)(\vec{W}_I \vec{x}^T))\sigma^{-1})}$$

effectively shifting the decision-making unit's readout from its baseline state during the reinforced context. Other models tested were subject to similar context dependent switches applied as follows:

$$\text{Gain Modulation: } P(y = 1 | \vec{x}) = \frac{1}{1 + \exp(-(\vec{c}_G \vec{s}^T)(\vec{W}_D \vec{x}^T - \vec{W}_I \vec{x}^T)\sigma^{-1})}$$

$$\text{Threshold shift: } P(y = 1 | \vec{x}) = \frac{1}{1 + \exp(-(\vec{W}_D \vec{x}^T - \vec{W}_I \vec{x}^T + \vec{c}_T \vec{s}^T)\sigma^{-1})}$$

$$\text{Excitatory scaling: } P(y = 1 | \vec{x}) = \frac{1}{1 + \exp(-((\vec{c}_E \vec{s}^T)(\vec{W}_D \vec{x}^T) - \vec{W}_I \vec{x}^T)\sigma^{-1})}$$

Note that gain modulation is effectively equivalent to a modulation of the noise parameter. Throughout training, we probed the model after every 100 reinforced trials ( $\vec{s} = [1 \ 0]$ ) for its behavior across 100 probe ( $\vec{s} = [0 \ 1]$ ) trials. Because mice received no positive reinforcer during the probe context trials, we assumed that synaptic weights were not updated during these probe



trials. This assumption allows probing to, theoretically, progress indefinitely to assess the baseline (non-scaled) behavior of the model, without altering the synaptic weights representing task knowledge. This allowed us to sample from the model during both behavioral contexts over the entire extent of learning.

**Modelling of rat behavioral data.** To generalize our model to the behavior of freely moving rats in a task without a binary choice point, we simply altered the readout function to yield a continuum of possible values for the percentage of time spent in the food cup. Rather than having the readout function yield the probability of a ‘Go’ response, we took this same value to indicate the percentage of time spent at the food cup. For example, when the original readout function yielded a probability of a ‘Go’ response as 65%, we converted this to mean 65% of time spent at the food-cup. The readout function in the rat behavioral task can thus be written as:

$$T = \frac{1}{1 + \exp(-(\vec{W}_D \vec{x}^T - \vec{W}_I \vec{x}^T) \sigma^{-1})}$$

where T is the percentage of the trial spent in the food cup. This thus preserves most aspects of the original model (with the exception of being slightly less stochastic), including the readout function serving as a measure of the animal’s bias toward one response given the stimulus.

**Model fitting.** All simulations and fitting procedures were performed in MATLAB. All tested models were fitted to data in both contexts simultaneously. To increase computational efficiency, we constructed a coarse-grained version of our model by assuming slow variations in the synaptic weights. During fitting, the model weights were updated in chunks of 10 trials, with stochasticity solely arising from the target and foil ratios in the given block. Trial ratios were pseudo-randomly drawn from a normal distribution ( $\mu=0.5$ ,  $\sigma=0.1$ ,  $<0.5 = F$ ,  $>0.5 = T$ ). During

each trial block, the reinforced-context performance was calculated given the synaptic weights preceding the given block, and synaptic weights subsequently updated on the basis of the probability of false-alarm and hit trials during the given 10 trials. For example:

$$\delta W_{D/S+} = \alpha W_{D/S+} (R - \kappa^{-1} (W_{D/S+} + W_{D/S} - W_{I/S+} - W_{I/S})) n_T P(y = 1 | \vec{W}_D, \vec{W}_I)$$

where  $n_T$  represents the number of target-tone trials in the given trial block, which is weighted by the probability of the model “licking” to the target tone given the current weights. The model was tested for the hit and false-alarm rates in the probe context. These approximations closely replicated the behavior of the fully stochastic model across a large number of runs, but required significantly less computational power. For each model, we minimized the Root Mean Square (RMS) error between the model performance and the behavioral S+ and S- response rates in both the reinforced and the probe context using Bayesian adaptive direct search (BADs)(Acerbi and Ma, 2017). BADs alternates between a series of fast, local Bayesian optimization steps and a systematic, slower exploration of a mesh grid.

To ensure a robust model fit to the acquisition and context-dependent expression of task knowledge, we excluded a small number of reinforced context training blocks during which a robust but temporary decline in satiety and/or motivation was observed. These were defined as training blocks during which false-alarm rates and hit rates both decreased by  $> 30\%$  with respect to the preceding and proceeding training blocks (2 training blocks total across 7 animals). Additionally, one probe training block was excluded during model fitting because an insufficient number of trials for robust analysis (10 trials total). All other probe training blocks consisted of at least 20 trials and were included in analysis. For every trial after the peak hit rate was reached in the probe context, we assumed each animal achieved perfect discrimination based on our evidence from three animals in which the asymptotic hit rate was  $92 \pm 4\%$  and the false-alarm rate

was  $3 \pm 3\%$ . This assumption served a two-fold function: firstly, it allowed the model to ignore the cessation of behavioral responses in the probe context; secondly, it effectively penalized the model for adopting a strategy in which it assumed that perfect expression of task knowledge could not be achieved in the probe context, despite continued training. To allow the model to center its average performance around the generalized learning trajectories, we applied a light lowpass filter to behavioral learning trajectories during fitting, with filter coefficients equal to 0.20 and 0.33 in the reinforced and probe context, respectively.

**Analysis of model results.** Decision variables were generated from the average synaptic weights of stochastic models on a trial-by-trial basis, and serve to highlight the effects of contextual factors. The trajectories of these variables illustrate the decision read-out function as training progresses, and are separated into target and foil trials. For example, the instantaneous value of each trajectory is thus defined as  $\vec{W}_{D_{trial}} \vec{x}^T - \vec{W}_{I_{trial}} \vec{x}^T$  in the probe context. Error rates of each tested model were quantified as the sum of the RMS error between the model and behavioral learning trajectories across both behavioral contexts. For comparison, we ran stochastic models 200 times to capture the full extent of variance arising from random tone selection and noise in the decision read-out function.

To understand which of our parameter most strongly contributed to inter-individual variation observed in the reinforced context, we utilized a one-factor-at-a-time approach to examine how much each parameter could alter the learning curve versus how much real learning curves differed. First, we established the average parameters required to fit the average behavioral data (9 parameters). Next, we varied a single parameter (i.e.  $c_1$ ) within the range corresponding to all of the individual animal fits (i.e.  $c_1 = 0.07-0.48$ ) and calculated the resulting

error relative to the average fit for each value of the parameter (RMSE with respect to average behavior). We found the maximum error generated by this entire range of values (Maximum Model Error). We then calculated the maximum error within the behavioral data (Maximum Behavioral Error; RMSE of individual learning trajectories with respect to average learning trajectories), and defined explained variation as  $\frac{\text{Maximum Model Error}}{\text{Maximum Behavior Error}}$ . Finally, we performed this calculation for each of the model parameters ( $\alpha$ ,  $\alpha_{NR}$ ,  $\sigma$ ,  $\kappa$ ,  $W_E$ ,  $W_I$ ,  $W_{SE}$ ,  $W_{SI}$ , and  $c_I$ ). To determine how different parameters contributed to the model error, we divided our parameters into four groups: learning rates ( $\alpha$ ,  $\alpha_{NR}$ ), initial conditions ( $W_E$ ,  $W_I$ ,  $W_{SE}$ ,  $W_{SI}$ ), noise ( $\sigma$ ), and inhibitory scaling ( $c_I$ ). To remain conservative in our analysis, the parameter in each group that explained most variation was selected to be representative.

## QUANTIFICATION AND STATISTICAL ANALYSIS

All statistical analyses were performed in MATLAB or GraphPad Prism 7. Data sets were tested for normality, and appropriate statistical tests applied as described in the text (for example, *t*-test for normally distributed data, Fischer's exact test for categorical observations, Mann Whitney *U*-test for non-parametric data, Friedman test with Dunn *post hoc* test for non-parametric data with repeated measurements). All statistical tests used were two-tailed. Model-variance designed to reflect the stochasticity of behavioral decision making was drawn from a standard normal distribution, and all model comparisons thus assumed normality. Shaded regions surrounding behavioral line-plots indicate  $\pm$  s.e.m. unless otherwise stated. Shaded regions surrounding model line-plots indicate  $\pm$  st.d. unless otherwise stated. Experimenters were not blind to the conditions of the experiments during data collection and analysis.

## DATA AND SOFTWARE AVAILABILITY

All behavioral data that underlies the findings of this study, as well as all code related to the modeling work, is available at:

[http://froemkelab.med.nyu.edu/sites/default/files/Learning\\_Circuits\\_Model.zip](http://froemkelab.med.nyu.edu/sites/default/files/Learning_Circuits_Model.zip)

# REFERENCES

- Annau, Z., and Kamin, L.J. (1961). The conditioned emotional response as a function of intensity of the US. *Journal of comparative and physiological psychology* 54, 428.
- Bathellier, B., Tee, S.P., Hrovat, C., and Rumpel, S. (2013). A multiplicative reinforcement learning model capturing learning dynamics and interindividual variability in mice. *Proceedings of the National Academy of Sciences of the United States of America* 110, 19950-19955.
- Chu, M.W., Li, W.L., and Komiyama, T. (2016). Balancing the Robustness and Efficiency of Odor Representations during Learning. *Neuron* 92, 174-186.
- Daw, N.D., O'doherty, J.P., Dayan, P., Seymour, B., and Dolan, R.J. (2006). Cortical substrates for exploratory decisions in humans. *Nature* 441, 876.
- Dhawale, A.K., Poddar, R., Wolff, S.B.E., Normand, V.A., Kopelowitz, E., and Ölveczky, B.P. (2017). Automated long-term recording and analysis of neural activity in behaving animals. *eLife* 6, e27702.
- Doya, K. (2000). Reinforcement learning in continuous time and space. *Neural computation* 12, 219-245.
- Fusi, S., Asaad, W.F., Miller, E.K., and Wang, X.J. (2007). A neural circuit model of flexible sensorimotor mapping: learning and forgetting on multiple timescales. *Neuron* 54, 319-333.
- Gallagher, M., and Holland, P.C. (1992). Preserved configural learning and spatial learning impairment in rats with hippocampal damage. *Hippocampus* 2, 81-88.
- Godden, D.R., and Baddeley, A.D. (1975). Context-dependent memory in two natural environments: On land and underwater. *British Journal of psychology* 66, 325-331.
- Halpern, S.D., Andrews, T.J., and Purves, D. (1999). Interindividual variation in human visual performance. *Journal of cognitive neuroscience* 11, 521-534.
- Hangya, B., Ranade, S.P., Lorenc, M., and Kepecs, A. (2015). Central Cholinergic Neurons Are Rapidly Recruited by Reinforcement Feedback. *Cell* 162, 1155-1168.
- Holland, P.C., and Lamarre, J. (1984). Transfer of inhibition after serial and simultaneous feature negative discrimination training. *Learning and Motivation* 15, 219-243.
- Huber, D., Gutnisky, D.A., Peron, S., O'Connor, D.H., Wiegert, J.S., Tian, L., Oertner, T.G., Looger, L.L., and Svoboda, K. (2012). Multiple dynamic representations in the motor cortex during sensorimotor learning. *Nature* 484, 473-478.
- Issa, J.B., Haeffele, B.D., Agarwal, A., Bergles, D.E., Young, E.D., and Yue, D.T. (2014). Multiscale optical Ca<sup>2+</sup> imaging of tonal organization in mouse auditory cortex. *Neuron* 83, 944-959.
- Joëls, M., Pu, Z., Wiegert, O., Oitzl, M.S., and Krugers, H.J. (2006). Learning under stress: how does it work? *Trends in cognitive sciences* 10, 152-158.
- Jurjut, O., Georgieva, P., Busse, L., and Katzner, S. (2017). Learning Enhances Sensory Processing in Mouse V1 before Improving Behavior. *The Journal of neuroscience : the official journal of the Society for Neuroscience* 37, 6460-6474.
- Kato, H.K., Gillet, S.N., and Isaacson, J.S. (2015). Flexible Sensory Representations in Auditory Cortex Driven by Behavioral Relevance. *Neuron* 88, 1027-1039.
- Kawai, R., Markman, T., Poddar, R., Ko, R., Fantana, A.L., Dhawale, A.K., Kampff, A.R., and Ölveczky, B.P. (2015). Motor cortex is required for learning but not for executing a motor skill. *Neuron* 86, 800-812.
- Krakauer, J.W., Ghazanfar, A.A., Gomez-Marín, A., MacIver, M.A., and Poeppel, D. (2017). Neuroscience Needs Behavior: Correcting a Reductionist Bias. *Neuron* 93, 480-490.
- Kuchibhotla, K.V., Gill, J.V., Lindsay, G.W., Papadoyannis, E.S., Field, R.E., Sten, T.A., Miller, K.D., and Froemke, R.C. (2016). Parallel processing by cortical inhibition enables context-dependent behavior. *Nature neuroscience*.

974 Lee, D., Seo, H., and Jung, M.W. (2012). Neural basis of reinforcement learning and decision making. *Annu Rev*  
975 *Neurosci* 35, 287-308.

976 Luksys, G., Gerstner, W., and Sandi, C. (2009). Stress, genotype and norepinephrine in the prediction of mouse  
977 behavior using reinforcement learning. *Nature neuroscience* 12, 1180-1186.

978 Makino, H., and Komiyama, T. (2015). Learning enhances the relative impact of top-down processing in the visual  
979 cortex. *Nature neuroscience* 18, 1116-1122.

980 Maloney, E.A., and Beilock, S.L. (2012). Math anxiety: who has it, why it develops, and how to guard against it.  
981 *Trends Cogn Sci* 16, 404-406.

982 Marr, D. A computational investigation into the human representation and processing of visual information.

983 Matzel, L.D., Han, Y.R., Grossman, H., Karnik, M.S., Patel, D., Scott, N., Specht, S.M., and Gandhi, C.C. (2003).  
984 Individual differences in the expression of a "general" learning ability in mice. *The Journal of neuroscience : the*  
985 *official journal of the Society for Neuroscience* 23, 6423-6433.

986 Otchy, T.M., Wolff, S.B., Rhee, J.Y., Pehlevan, C., Kawai, R., Kempf, A., Gobes, S.M., and Olveczky, B.P. (2015).  
987 Acute off-target effects of neural circuit manipulations. *Nature* 528, 358-363.

988 Peron, S.P., Freeman, J., Iyer, V., Guo, C., and Svoboda, K. (2015). A Cellular Resolution Map of Barrel Cortex  
989 Activity during Tactile Behavior. *Neuron* 86, 783-799.

990 Peters, A.J., Chen, S.X., and Komiyama, T. (2014). Emergence of reproducible spatiotemporal activity during motor  
991 learning. *Nature*.

992 Polley, D.B., Steinberg, E.E., and Merzenich, M.M. (2006). Perceptual learning directs auditory cortical map  
993 reorganization through top-down influences. *The Journal of neuroscience : the official journal of the Society for*  
994 *Neuroscience* 26, 4970-4982.

995 Poort, J., Khan, A.G., Pachitariu, M., Nemri, A., Orsolic, I., Krupic, J., Bauza, M., Sahani, M., Keller, G.B., Mrsic-  
996 Flogel, T.D., *et al.* (2015). Learning Enhances Sensory and Multiple Non-sensory Representations in Primary Visual  
997 Cortex. *Neuron* 86, 1478-1490.

998 Rothschild, G., Nelken, I., and Mizrahi, A. (2010). Functional organization and population dynamics in the mouse  
999 primary auditory cortex. *Nature neuroscience* 13, 353-360.

1000 Schultz, W., Dayan, P., and Montague, P.R. (1997). A neural substrate of prediction and reward. *Science* 275, 1593-  
1001 1599.

1002 Silver, R.A. (2010). Neuronal arithmetic. *Nature reviews Neuroscience* 11, 474-489.

1003 Smart, I., and McSherry, G. (1986). Gyrus formation in the cerebral cortex in the ferret. I. Description of the  
1004 external changes. *Journal of anatomy* 146, 141.

1005 Sutton, R.S., and Barto, A.G. (1998). Reinforcement learning: An introduction, Vol 1 (MIT press Cambridge).

1006 Tolman, E.C. (1948). Cognitive maps in rats and men. *Psychological review* 55, 189.

1007 Tolman, E.C., and Honzik, C.H. (1930). Introduction and removal of reward, and maze performance in rats.  
1008 University of California publications in psychology.

1009 Winkowski, D.E., and Kanold, P.O. (2013). Laminar transformation of frequency organization in auditory cortex.  
1010 *The Journal of neuroscience : the official journal of the Society for Neuroscience* 33, 1498-1508.

1011 Wright, D.L., and Shea, C.H. (1991). Contextual dependencies in motor skills. *Mem Cognit* 19, 361-370.

1012 Wu, H.G., Miyamoto, Y.R., Castro, L.N.G., Ölveczky, B.P., and Smith, M.A. (2014). Temporal structure of motor  
1013 variability is dynamically regulated and predicts motor learning ability. *Nature neuroscience* 17, 312.

1014 Zaborszky, L., Csordas, A., Mosca, K., Kim, J., Gielow, M.R., Vadasz, C., and Nadasdy, Z. (2015). Neurons in the  
1015 basal forebrain project to the cortex in a complex topographic organization that reflects corticocortical connectivity  
1016 patterns: an experimental study based on retrograde tracing and 3D reconstruction. *Cerebral cortex* 25, 118-137.

1017

## Acknowledgments

We thank C. Firestone, C. Honey, J. Chen, K. Katlowitz, K. Narasimhan, and W.J. Ma for comments on earlier versions of this manuscript; W.J. Ma, R. Kiani, M. Long and K. Louie for assistance with the conceptual model; J. Multani for assistance with behavioral experiments. This work was funded by grants from NIDCD (DC009635 and DC012557), a Hirschl/Weill-Caulier Career Award, and a Howard Hughes Medical Institute Faculty Scholarship (R.C.F.); the NIDCD (DC05014) (K.V.K.); and the Programme Emergences of City of Paris, ANR grants ANR-17-ERC2-0005, ANR-16-CE37-0016, and the program “Investissements d’Avenir” ANR-10-LABX-0087 IEC and ANR- 11-IDEX-0001-02 PSL Research University (S.O.); and the NIH training program in computational neuroscience (R90DA043849) (T.A.H.S.).

## Author Contributions

K.V.K., Y.B., P.C.H., R.K, and E.S.P. performed behavioral experiments. T.A.H.S., S.O. and K.V.K. designed and T.A.H.S. implemented the theoretical model. K.V.K. and T.A.H.S. performed analysis. All authors discussed experiments and contributed to the manuscript.

## Author information

The authors declare no competing financial interests. Correspondence and requests for additional materials should be addressed to K.V.K. ([kkuchib1@jhu.edu](mailto:kkuchib1@jhu.edu))
